# Supplementary material for: Activated T-Follicular Helper 2 Cells Are Associated With Disease Activity in IgG4-Related Sclerosing Cholangitis and Pancreatitis
Source: PubMed Central journal article supplement — Clin Transl Gastroenterol. 2019 Apr 30;10(4):e00020. doi: 10.14309/ctg.0000000000000020 (PMC6602789; doi:10.14309/ctg.0000000000000020), 2019-04-30

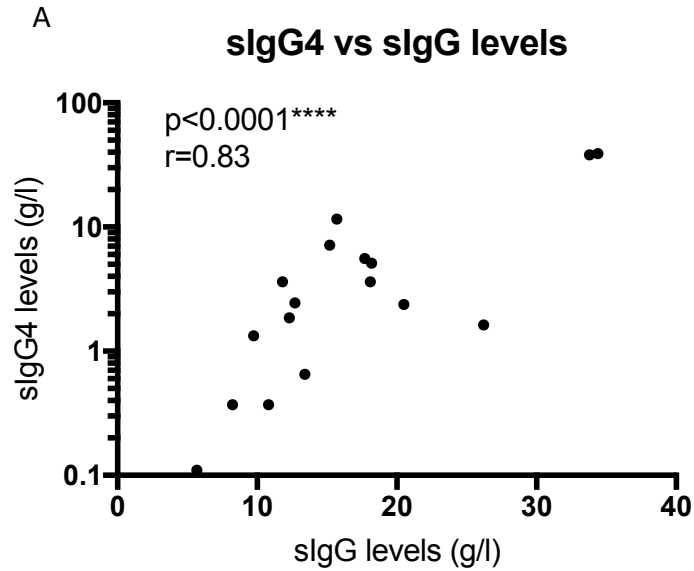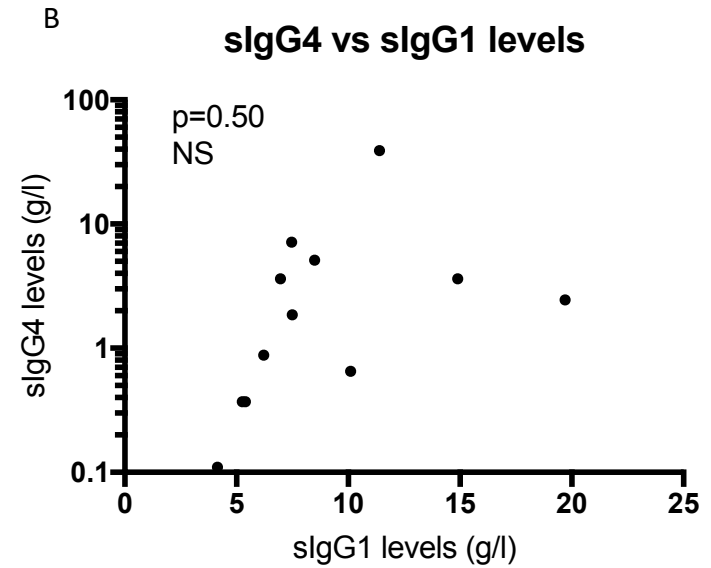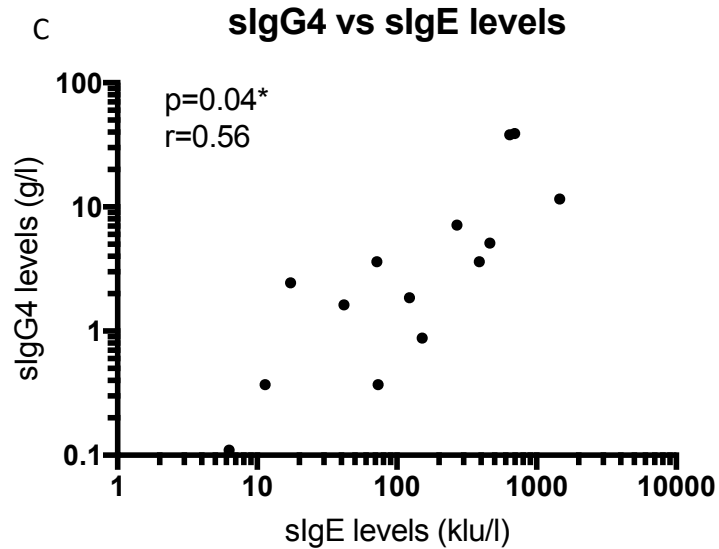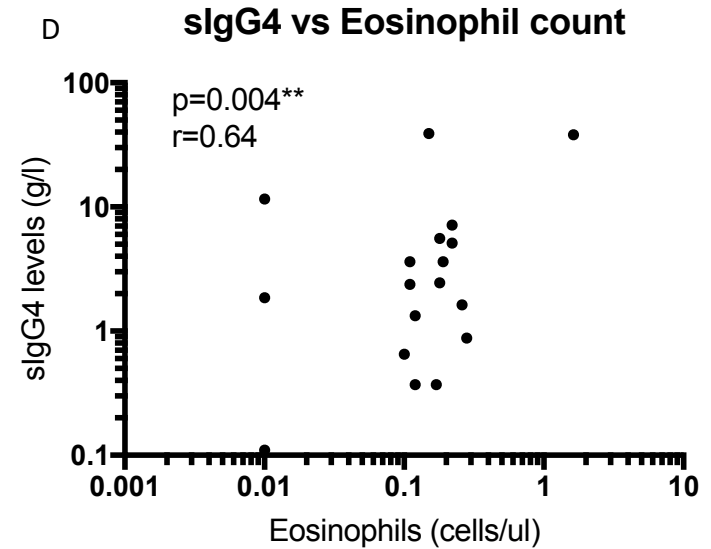

A

## PD1+ Tfh2 and IL4

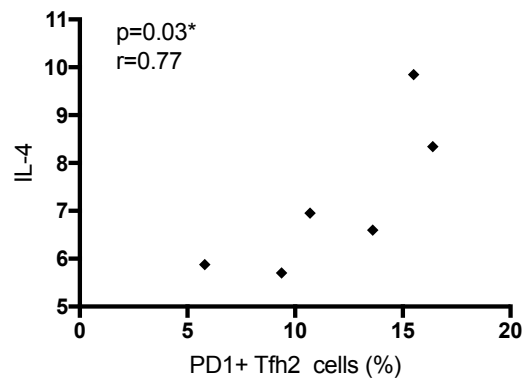

B

## PD1+ Tfh2 and IL21

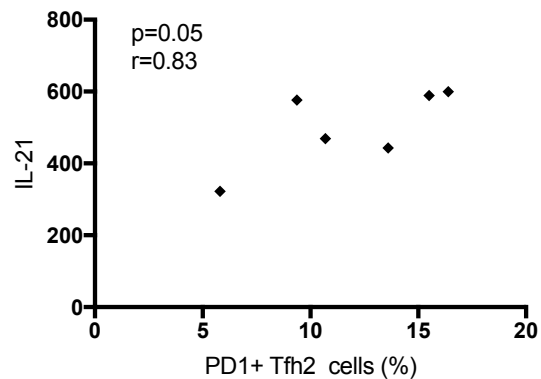

C

## PD1+ Tfh2 and IL10

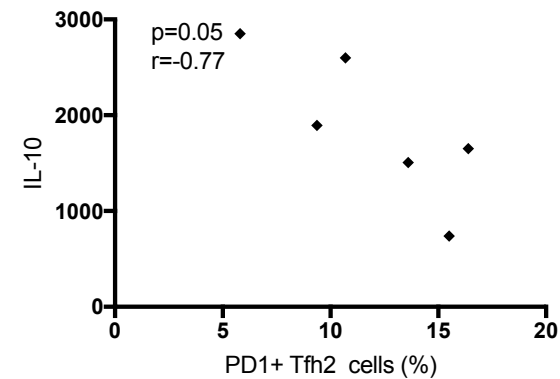

D

## PD1+ Tfh17 and IL21

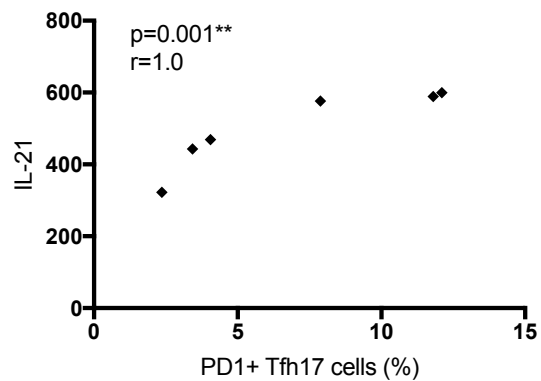

E

## PD1+ Tfh17 and IL13

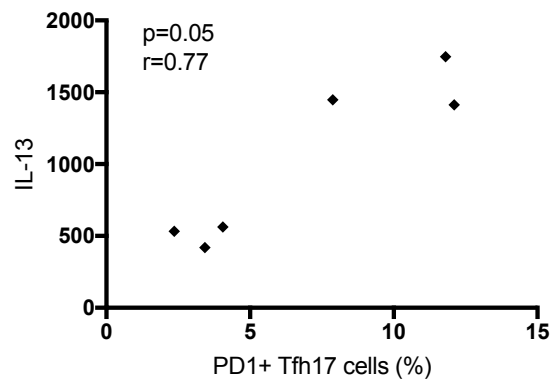

F

## PD1+ Tfh17 and IL5

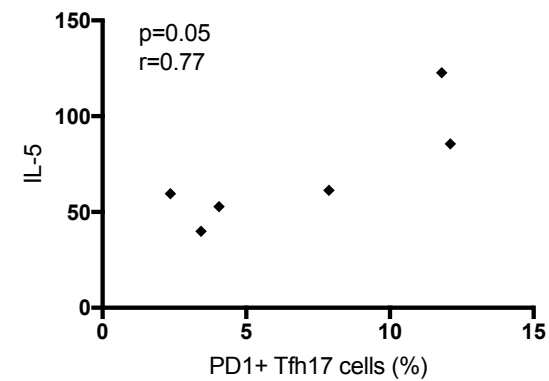

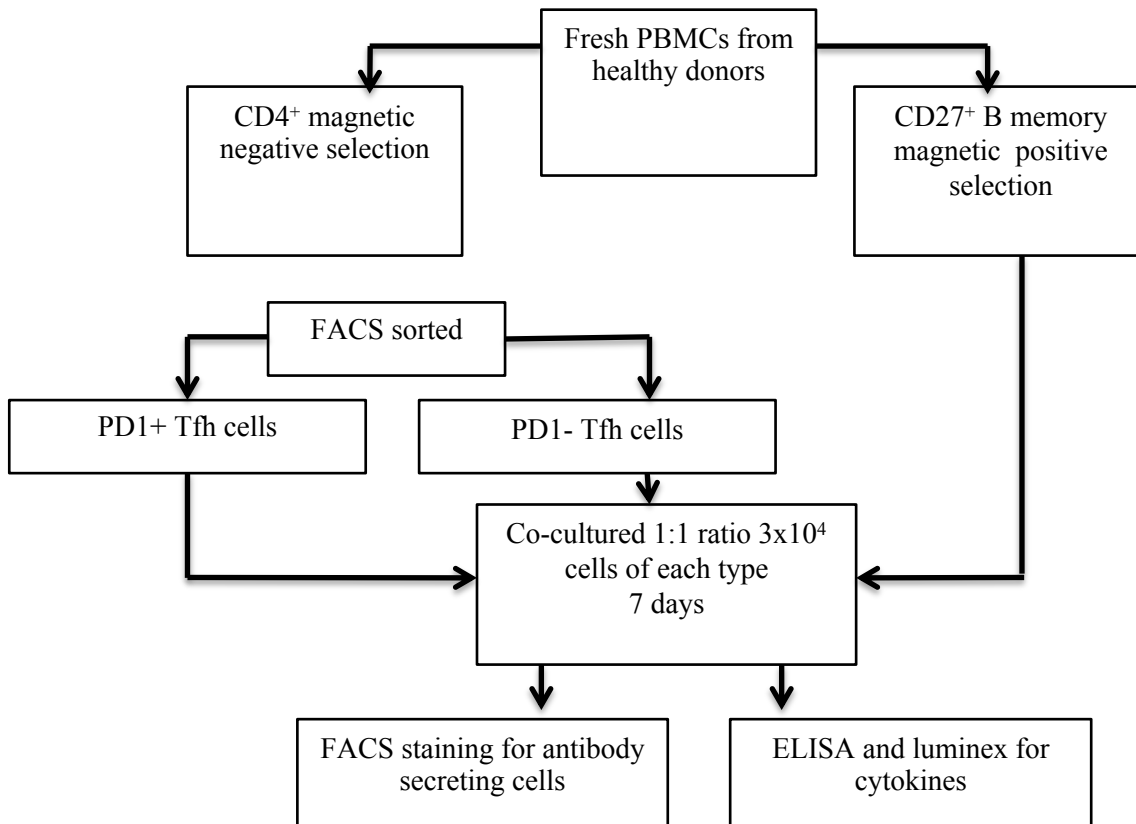

**A PD1+ cells and Serum IgG**

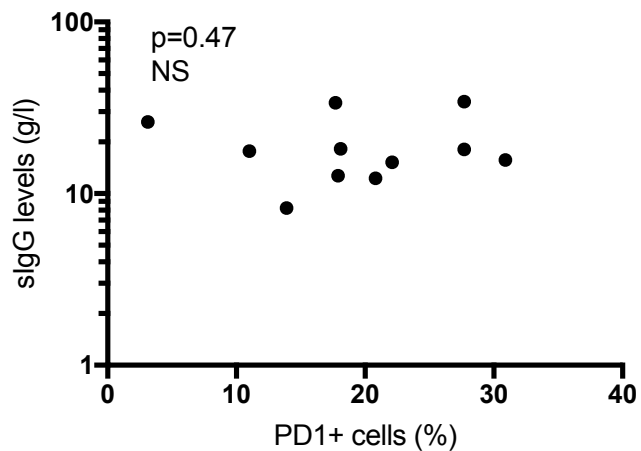

**B PD1+ cells and Serum IgG1**

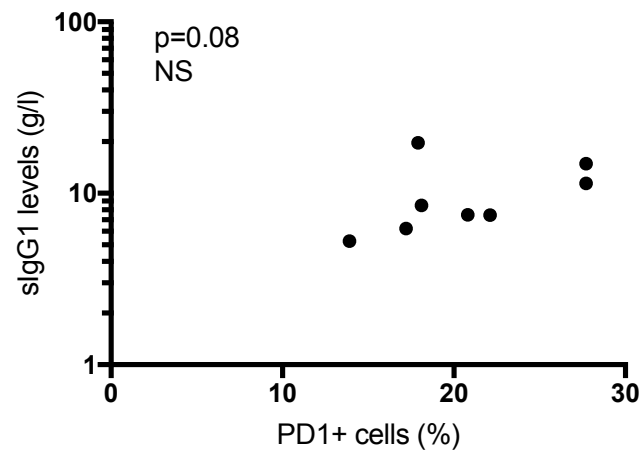

**C PD1+ cells and Serum IgG4**

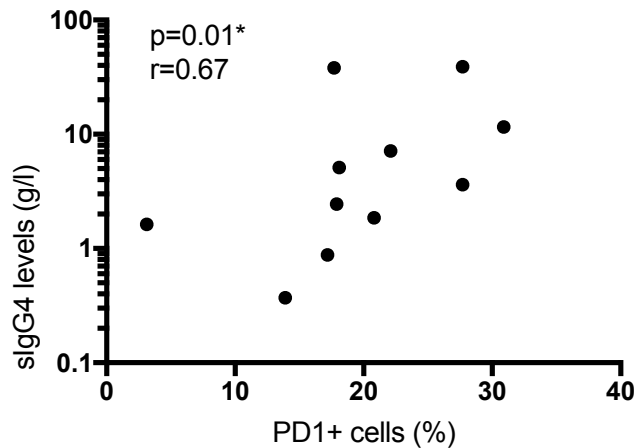

**D PD1+ cells and Serum IgE**

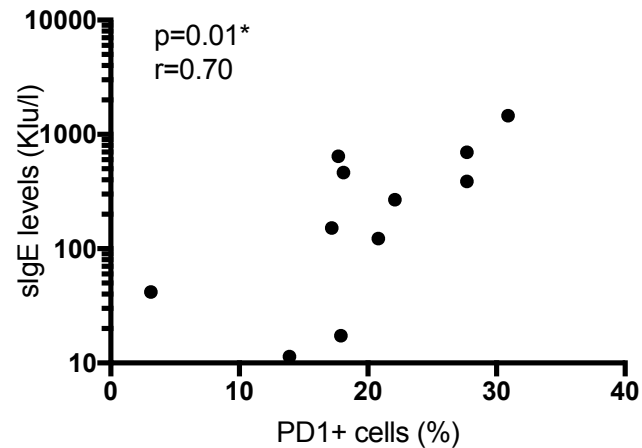

A

## PD1+ cells and Eosinophils

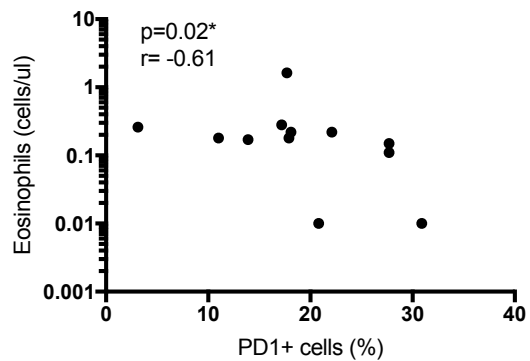

B

## PD1+ Tfh2 cells and Eosinophils

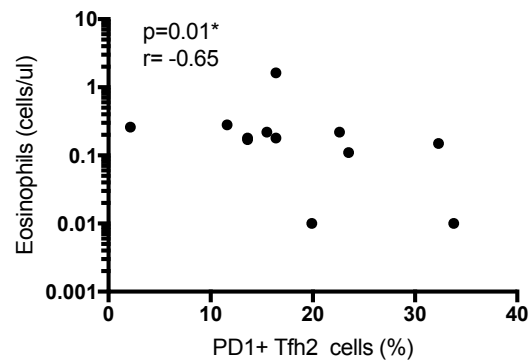

C

## PD1+ Tfh17 cells and Eosinophils

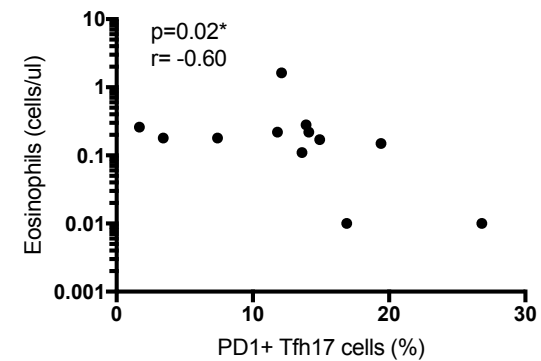

D

## PD1+ Tfh1 cells and Eosinophils

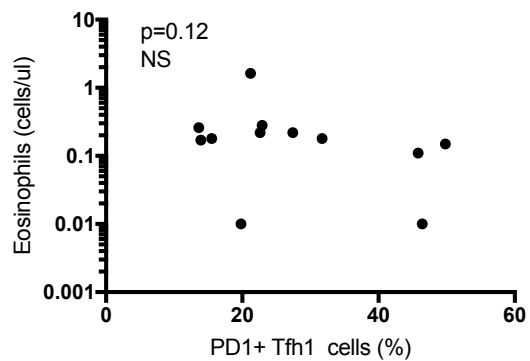

E

## PD1+ Tfh cells and Atopy in IgG4-SC/AIP

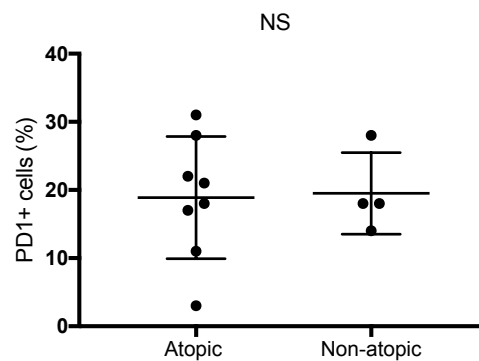

F

## PD1+ Tfh2 cells and Atopy in IgG4-SC/AIP

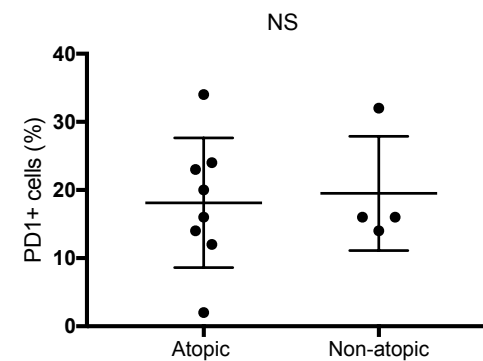

Supplement: ct9-10-e00020-s001.pdf [file ct9-10-e00020-s001.pdf]
